# Supplementary material for: Large-scale measurement of soil organic carbon using compact near-infrared spectrophotometers: effect of soil sample preparation and the use of local modelling
Source: Royal Society of Chemistry journal article supplement (doi:10.1039/d3va00046j), 2023-01-01
Supplement: d3va00046j2.pdf [file d3va00046j2.pdf]

1

# Supplementary material

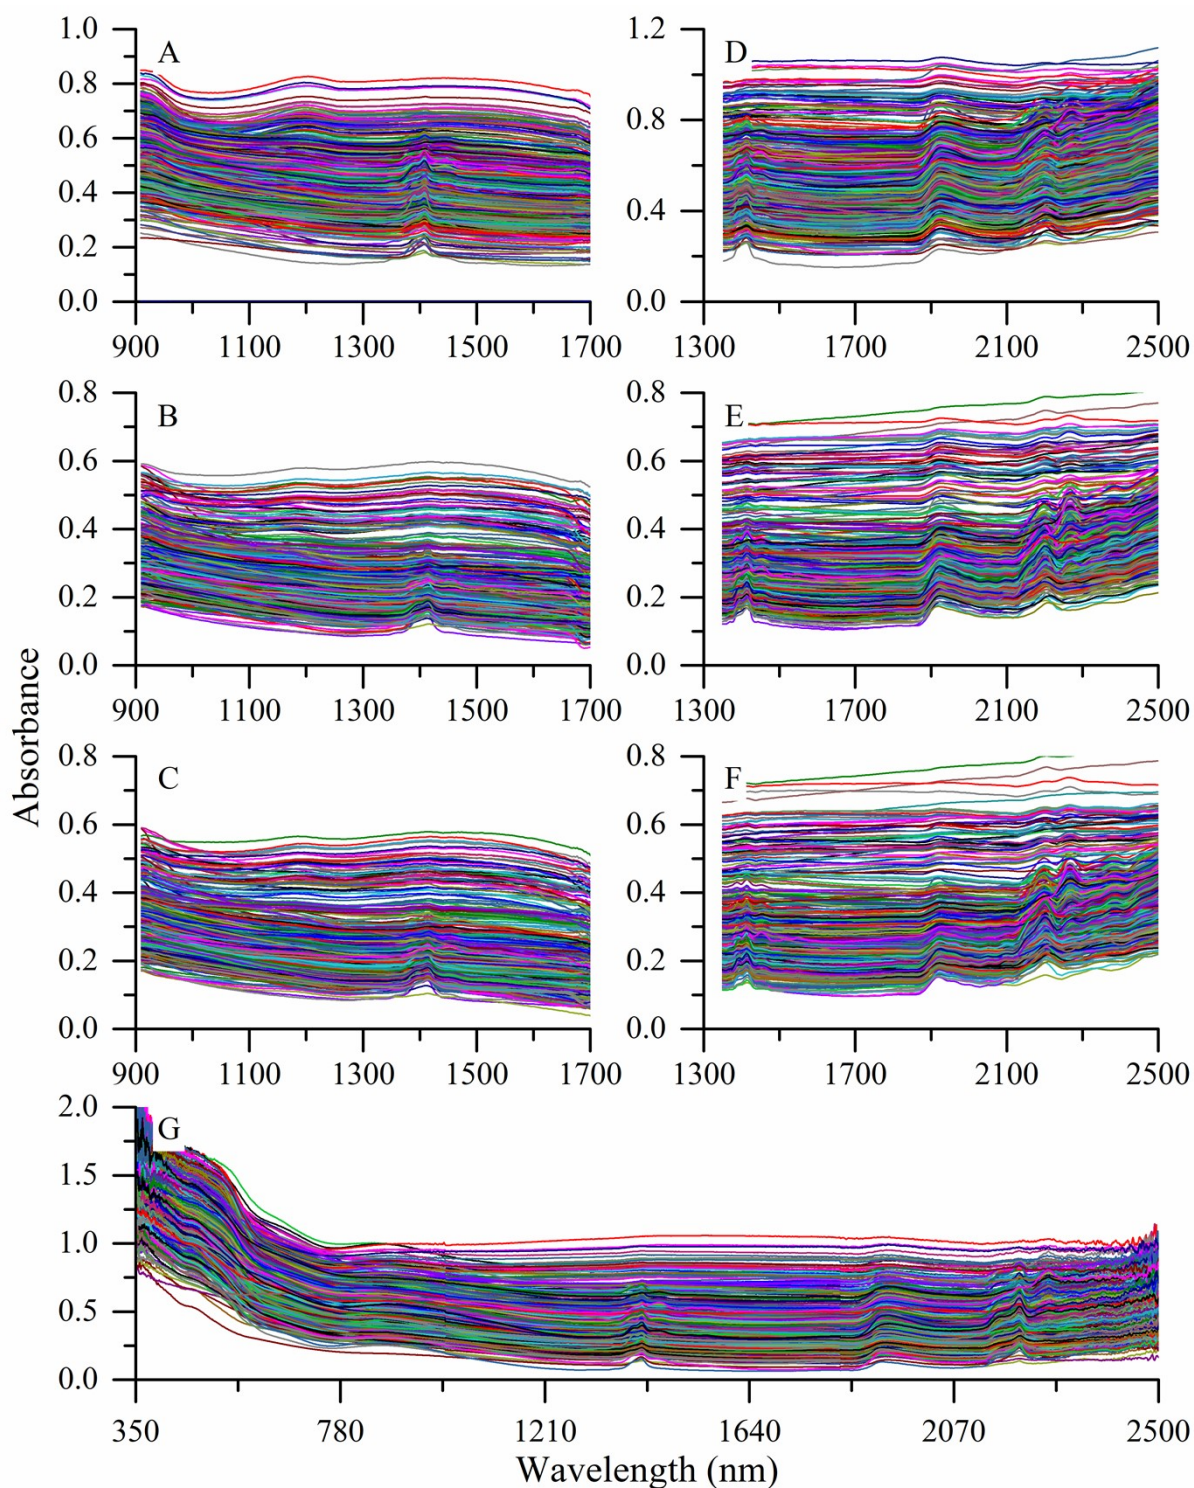

2

**Figure S1.** Absorbance spectra of the sample set acquired using NanoNIR and soil sample preparation modes I (A), II (B), and III (C); NeoSpectra and soil sample preparation modes I (D), II (E) and III (F); and Vis-NIR spectrophotometer (G). Mode I = air-dried and 2 mm sieved soil samples; Mode II = air-dried and ground soil samples; Mode III = oven-dried and ground soil samples.

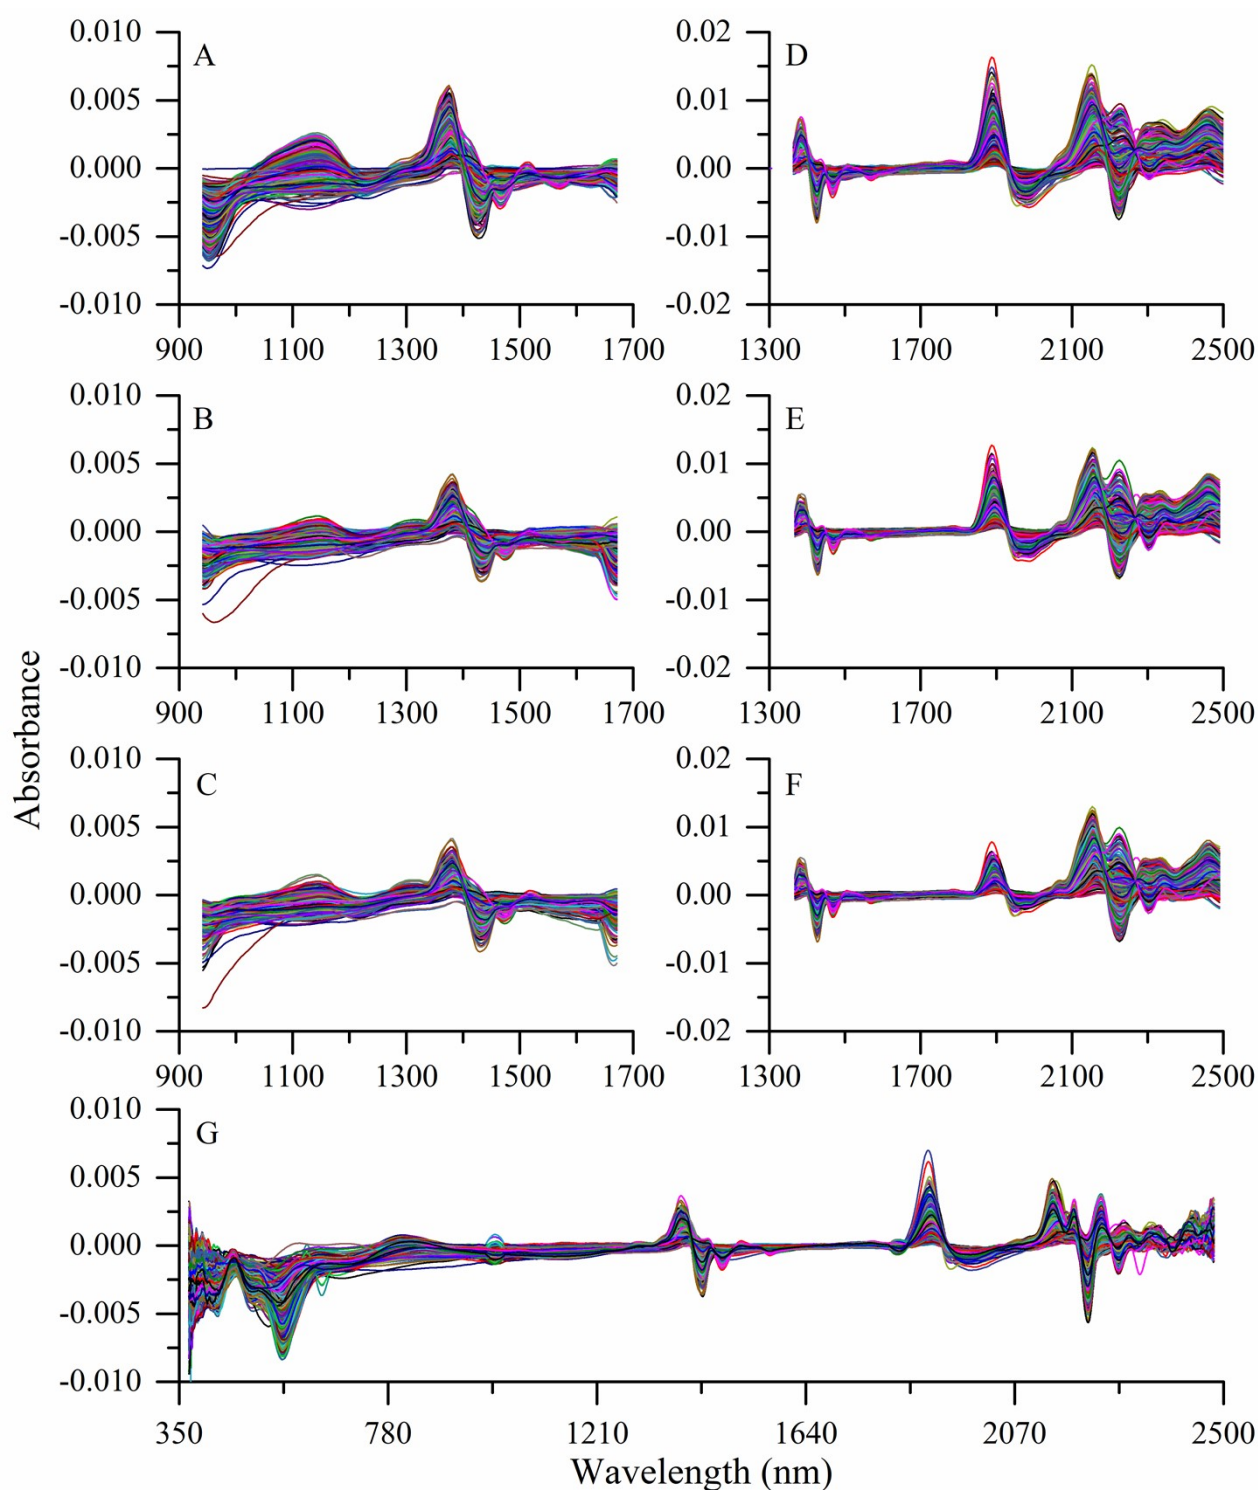

7

8 **Figure S2.** First-derivative spectra of the sample set acquire using NanoNIR and soil sample  
 9 preparation modes I (A), II (B), and III (C); NeoSpectra and soil sample preparation modes I (D), II  
 10 (E) and III (F); and Vis-NIR spectrophotometer (G). Mode I = air-dried and 2 mm sieved soil samples;  
 11 Mode II = air-dried and ground soil samples; Mode III = oven-dried and ground soil samples.

**Table S1.** Results of randomization test for accuracy comparison between models built using different spectrophotometers

| Spectra acquisition protocol <sup>a</sup> |                      | RMSEP (g kg <sup>-1</sup> ) |         | P-Value |
|-------------------------------------------|----------------------|-----------------------------|---------|---------|
| Model-A                                   | Model-B              | Model-A                     | Model-B |         |
| NeoSpectra – Mode I                       | NanoNIR – Mode I     | 6.3                         | 8.2     | < 0,001 |
| NeoSpectra – Mode II                      | NanoNIR – Mode II    | 6.0                         | 7.6     | < 0,001 |
| NeoSpectra – Mode III                     | NanoNIR – Mode III   | 6.0                         | 7.6     | < 0,001 |
| NeoSpectra – Mode I                       | Vis-NIR <sup>b</sup> | 6.3                         | 6.8     | 0,028   |
| NeoSpectra – Mode II                      | Vis-NIR              | 6.0                         | 6.8     | 0,004   |
| NeoSpectra – Mode III                     | Vis-NIR              | 6.0                         | 6.8     | 0.009   |
| NanoNIR – Mode I                          | Vis-NIR              | 8.2                         | 6.8     | < 0,001 |
| NanoNIR – Mode II                         | Vis-NIR              | 7.6                         | 6.8     | 0,006   |
| NanoNIR – Mode III                        | Vis-NIR              | 7.6                         | 6.8     | 0,006   |

<sup>a</sup>Mode I, air-dried and 2 mm sieved soil samples; Mode II, air-dried and ground soil samples; Mode III, oven-dried and ground soil samples. <sup>b</sup>Spectral data acquired using Vis-NIR spectrophotometer were measured using oven-dried (45 °C) and 2 mm sieved soil samples.

17 **Table S2.** Results of randomization test for accuracy comparison between models built using  
 18 different soil sample preparation modes<sup>a</sup>

| Spectra acquisition protocol |          | RMSEP (g kg <sup>-1</sup> ) |         | P-Value |
|------------------------------|----------|-----------------------------|---------|---------|
| Model-A                      | Model-B  | Model-A                     | Model-B |         |
| NeoSpectra                   |          |                             |         |         |
| Mode I                       | Mode II  | 6.3                         | 6.0     | 0.196   |
| Mode I                       | Mode III | 6.3                         | 6.0     | 0.214   |
| Mode II                      | Mode III | 6.0                         | 6.0     | 0.903   |
| NanoNIR                      |          |                             |         |         |
| Mode I                       | Mode II  | 8.2                         | 7.6     | 0.001   |
| Mode I                       | Mode III | 8.2                         | 7.6     | 0.001   |
| Mode II                      | Mode III | 7.6                         | 7.6     | 0.826   |

19 <sup>a</sup>Mode I = air-dried and 2 mm sieved soil samples; Mode II = air-dried and ground soil samples; Mode  
 20 III = oven-dried and ground soil samples.

**Table S3.** Results for accuracy comparison between GLOBAL-PLSR and LOCAL-PLSR using the randomization test

|            | RMSEP (g kg <sup>-1</sup> ) |            | P-Value |
|------------|-----------------------------|------------|---------|
|            | GLOBAL-PLSR                 | LOCAL-PLSR |         |
| NeoSpectra |                             |            |         |
| Mode I     | 6.3                         | 5.9        | 0.079   |
| Mode II    | 6.0                         | 5.3        | < 0.001 |
| Mode III   | 6.0                         | 5.2        | 0.001   |
| NanoNIR    |                             |            |         |
| Mode I     | 8.2                         | 7.5        | < 0.001 |
| Mode II    | 7.6                         | 7.1        | 0.013   |
| Mode III   | 7.6                         | 7.0        | < 0,001 |

<sup>a</sup>Mode I = air-dried and 2 mm sieved soil samples; Mode II = air-dried and ground soil samples; Mode III = oven-dried and ground soil samples.

**Table S4.** Performance of LOCAL-PLSR in large-scale SOC determination using the NeoSpectra and oven-dried and ground soil samples according to the Mahalanobis distance used as the limit to select the nearest neighbors to be included in the local calibration set

| Mahalanobis distance <sup>a</sup> | RMSEP (g kg <sup>-1</sup> ) | • Number of analyzed samples <sup>b</sup> |
|-----------------------------------|-----------------------------|-------------------------------------------|
| 1.0                               | 2.8                         | 3                                         |
| 1.1                               | 4.2                         | 8                                         |
| 1.2                               | 4.8                         | 22                                        |
| 1.3                               | 4.4                         | 46                                        |
| 1.4                               | 4.8                         | 62                                        |
| 1.5                               | 4.8                         | 83                                        |
| 1.6                               | 5.1                         | 110                                       |
| ...                               | ...                         | ...                                       |
| 3.3                               | 5.2                         | 160                                       |

<sup>a</sup>Mahalanobis distance is the limit to select the nearest neighbors to be included in the local calibration set. <sup>b</sup>Number of samples in the validation set whose SOC content was determined by LOCAL-PLSR using a given Mahalanobis limit distance.
